# Supplementary material for: Correction: Early Treatment Critical: Bexarotene Reduces Amyloid-Beta Burden In Silico
Source: PLOS journal article supplement (doi:10.1371/journal.pone.0156474), 2016-05-24
Supplement: S1 (10.1371/journal.pone.0156474.s001) [file journal.pone.0156474.s001]

**S1 Text.** Note on *APP/PS1* mice. Trinchese and Liu reported formic acid-extractable  $A\beta_{42}$  levels in mice expressing both the Swedish mutation of *APP* (K670N:M671L) and human *PS1* (M146L) [1]. These mice present a similar pathology to the *APP/PS1* mice used by Cramer et al., which express both the Swedish mutation of *APP* and the  $\Delta E9$  mutation of *PS1* [2, 3].
